# Supplementary material for: Low silver loaded biphase of TiO2 microrods with TiO2(B)/anatase and their photocatalytic and antibacterial properties
Source: Research Square preprint supplement (doi:10.21203/rs.3.rs-7513011/v1), 2025-09-11
Supplement: Supplementary file 1 [file 02456ca6f75b38d530e78321.docx]

**Supporting information**

### **Low silver loaded biphase of TiO2 microrods with TiO2(B)/anatase and their photocatalytic and antibacterial properties**

Zhijie Dinga,b, Zetan Zhanga, Zhitao Chena, Yang Wanga, Ruiqi Wanga, Xinyu Xiaa, Lei Baia*, You Liua,b, Xuchun Wanga,b, Yu Guoa,b

（a. College of Chemistry and Materials Engineering, Anhui Science and Technology University, Bengbu, 233000, China；

b. Anhui Province Quartz Sand Purification and Photovoltaic Glass Engineering Research Center, Chuzhou, 233100, China）


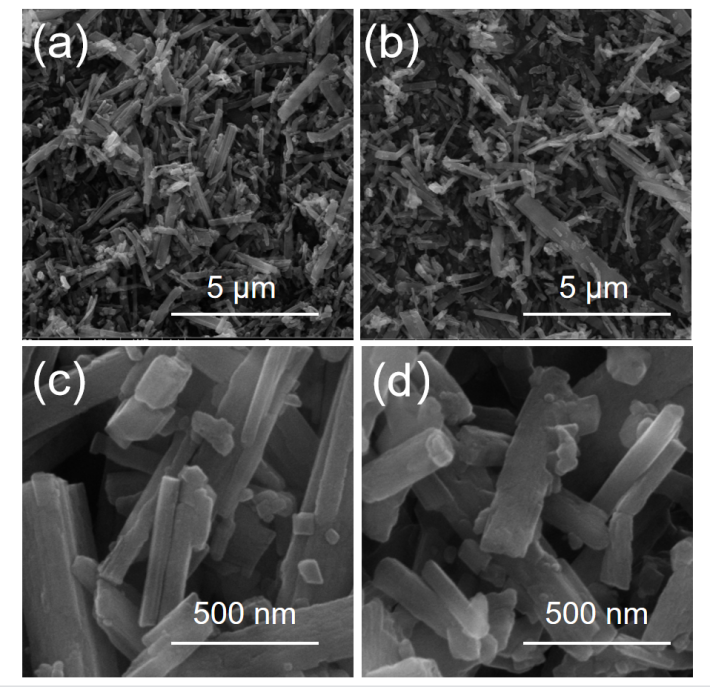


**SFig. 1 SEM images of TiO2 MRs (image a and c) and Ag/TiO2 MRs-B (image b and d)**

**SFig. 2 UV–Vis difuse refection spectra (a) and (F*hν*) 1/2 as a function of photon energy (*hν*) of the samples (b), where *F* is the Kubelka–Munk function of the difuse refectance R**

**SFig. 3 N2 adsorption–desorption isotherm of TiO2 MRs (a)and Ag/TiO2 MRs-B (b)**

**STable 1 Rate constants for the photocatalytic degradation of MB under ultraviolet radiation**

| Sample | Apparent rate constant/min-1 | R2 |
| --- | --- | --- |
| TiO2 MRs | 0.05564 | 0.98554 |
| Ag/TiO2 MRs-A | 0.07464 | 0.99034 |
| Ag/TiO2 MRs-B | 0.08915 | 0.99741 |
| Ag/TiO2 MRs-C | 0.05378 | 0.98352 |

**STable 2 Rate constants for the photocatalytic degradation of RhB under ultraviolet radiation**

| Sample | Apparent rate constant/min-1 | R2 |
| --- | --- | --- |
| TiO2 MRs | 0.02371 | 0.99979 |
| Ag/TiO2 MRs-A | 0.08949 | 0.99879 |
| Ag/TiO2 MRs-B | 0.11382 | 0.99926 |
| Ag/TiO2 MRs-C | 0.07529 | 0.99838 |

**STable 3 Rate constants for the photocatalytic degradation of RhB by Ag/TiO2 MRs-B**

| Temperature/K | Apparent rate constant/min-1 | R2 |
| --- | --- | --- |
| 285.15 | 0.07981 | 0.98598 |
| 296.15 | 0.11382 | 0.99926 |
| 308.15 | 0.16325 | 0.99990 |

**SFig. 4**  **Photoluminescence spectroscopy of TiO2 MRs (A)and Ag/TiO2 MRs-B (B)**

**SFig. 5 EIS spectroscopy data fitting of TiO2 MRs and Ag/TiO2 MRs-B**

**STable 4 Rate constants for the photocatalytic degradation of RhB under xenon lamp**

| Sample | Apparent rate constant/min-1 | R2 |
| --- | --- | --- |
| TiO2 MRs | 0.01463 | 0.99614 |
| Ag/TiO2 MRs-A | 0.01541 | 0.99646 |
| Ag/TiO2 MRs-B | 0.01992 | 0.99761 |
| Ag/TiO2 MRs-C | 0.01848 | 0.99595 |

**STable 5 Diameter of inhibition zones**

| Sample | Replicate 1/mm | Replicate 2/mm | Replicate 3/mm | Mean/mm | RSD/% |
| --- | --- | --- | --- | --- | --- |
| Ag/TiO2 MRs-B | 12.50 | 12.80 | 12.20 | 12.5 | 2.40 |
| Ag/TiO2 MRs-C | 12.00 | 13.00 | 11.60 | 12.2 | 5.91 |
